# Supplementary material for: Annealing-induced chemical and structural changes in tri-iodide and mixed-halide organometal perovskite layers
Source: Royal Society of Chemistry journal article supplement (doi:10.1039/c5ta03039k), 2015-01-01
Supplement: c5ta03039k1.pdf [file c5ta03039k1.pdf]

## SUPPLEMENTAL INFORMATION

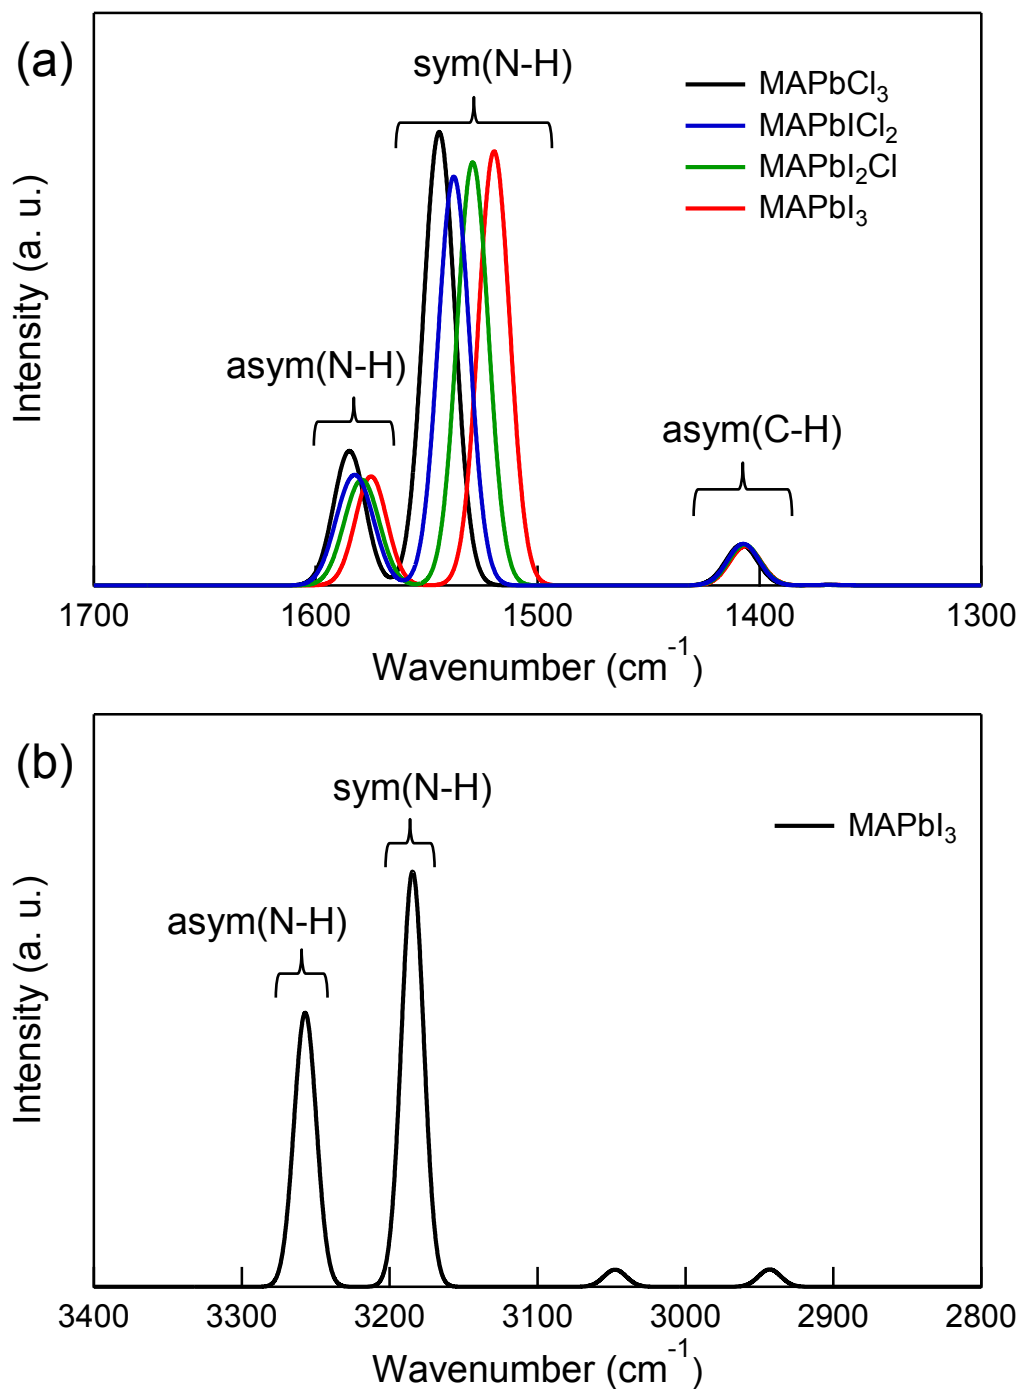

**Figure S1.** The simulated absorption spectra of MAPbCl<sub>3</sub>, MAPbICl<sub>2</sub>, MAPbI<sub>2</sub>Cl, and MAPbI<sub>3</sub> at low frequency region (a) and simulated absorption spectra of MAPbI<sub>3</sub> at high frequency region.

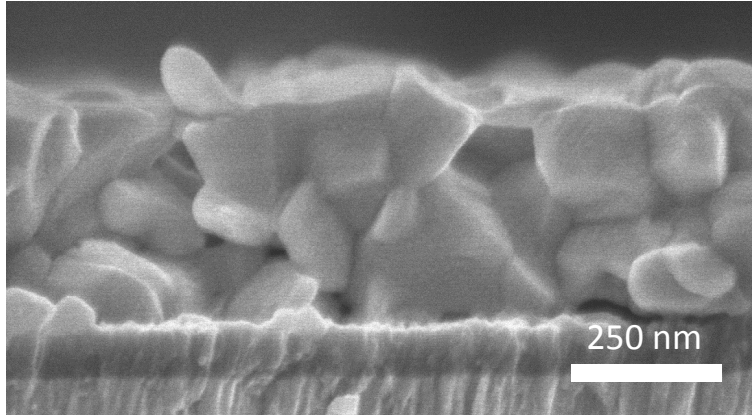

**Figure S2.** Cross-sectional SEM images of the TI perovskite layer annealed for 15 minutes.
